# Supplementary material for: Electrochemical flow injection analysis of the interaction between pyrroloquinoline quinone (PQQ) and α-synuclein peptides related to Parkinson's disease
Source: Royal Society of Chemistry journal article supplement (doi:10.1039/d1an00698c), 2021-01-01
Supplement: d1an00698c1.pdf [file d1an00698c1.pdf]

*Electronic Supplementary Information*  
*for*

**Electrochemical flow injection analysis of interaction  
between pyrroloquinoline quinone (PQQ) and  $\alpha$ -synuclein  
peptides related to Parkinson's disease**

*Shaopei Li, Meissam Noroozifar, Jiayun Zhou, Kagan Kerman\**

Department of Physical and Environmental Sciences, University of Toronto Scarborough,  
1265 Military Trail, Toronto, ON, M1C 1A4, Canada

\*Corresponding author: [kagan.kerman@utoronto.ca](mailto:kagan.kerman@utoronto.ca)

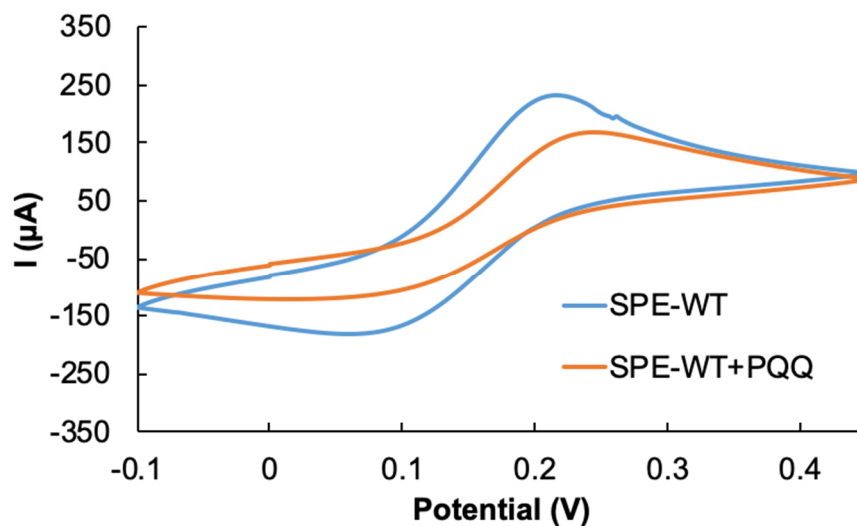

**Fig. S1** Cyclic voltammograms of the WT-modified SPE before (blue) and after (orange) interaction with PQQ at a scan rate of 100 mV/s with 10 mM  $[\text{Fe}(\text{CN})_6]^{3-/4-}$  as the redox probe in 0.1 M  $\text{NaClO}_4$  (pH 7.0).

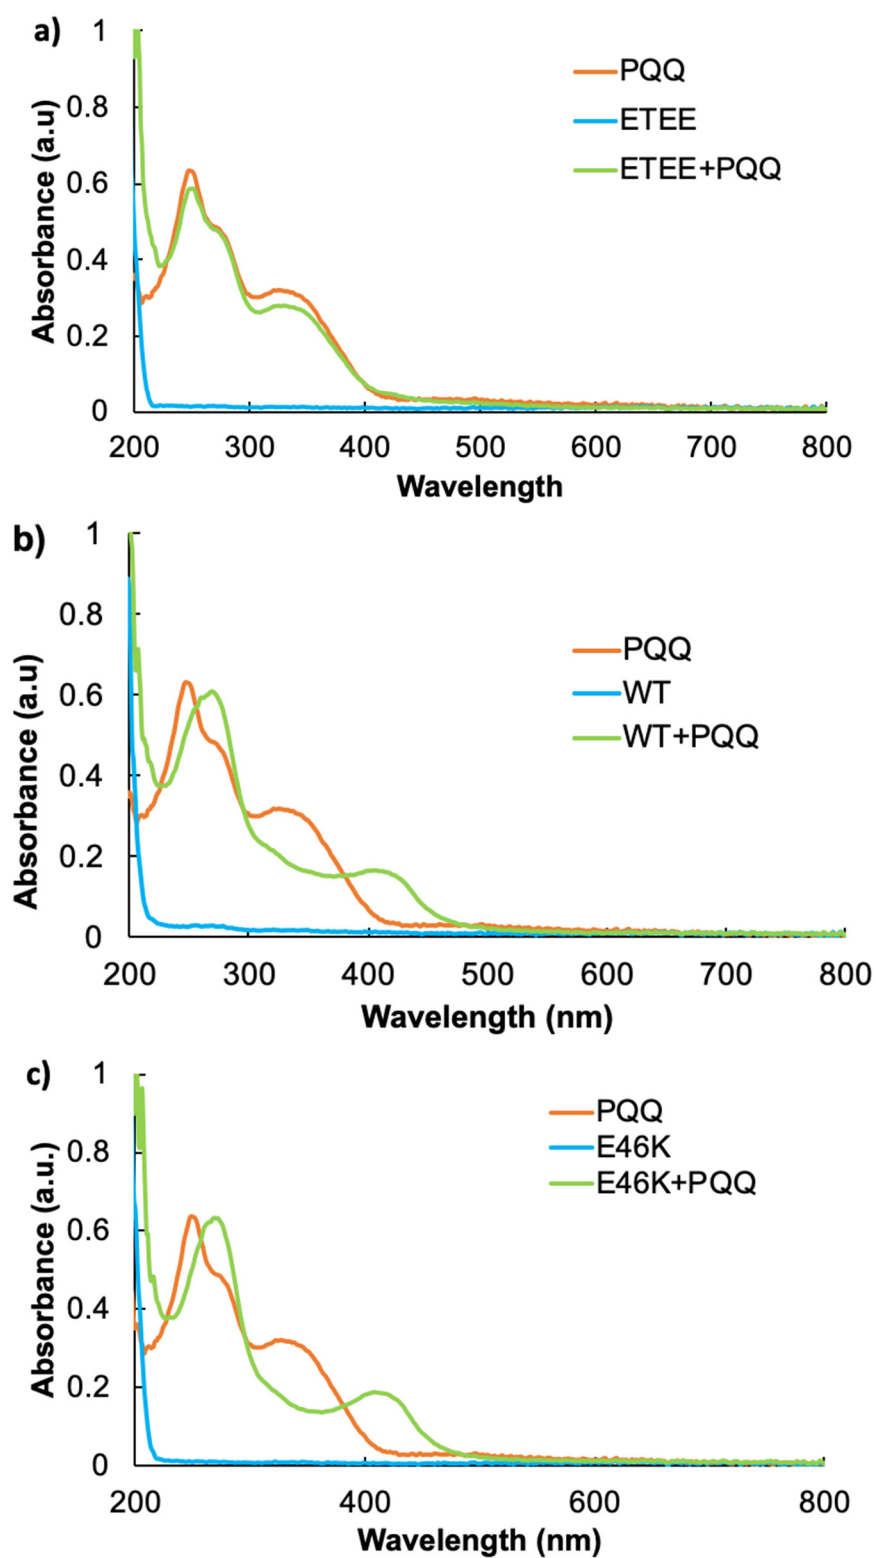

**Fig. S2** UV-vis spectra of 1 mM PQQ (orange), 1 mM peptide solution (blue), and peptide-PQQ complex (green) different species of  $\alpha$ -syn peptides a) ETEE, b) WT, and c) E46K.

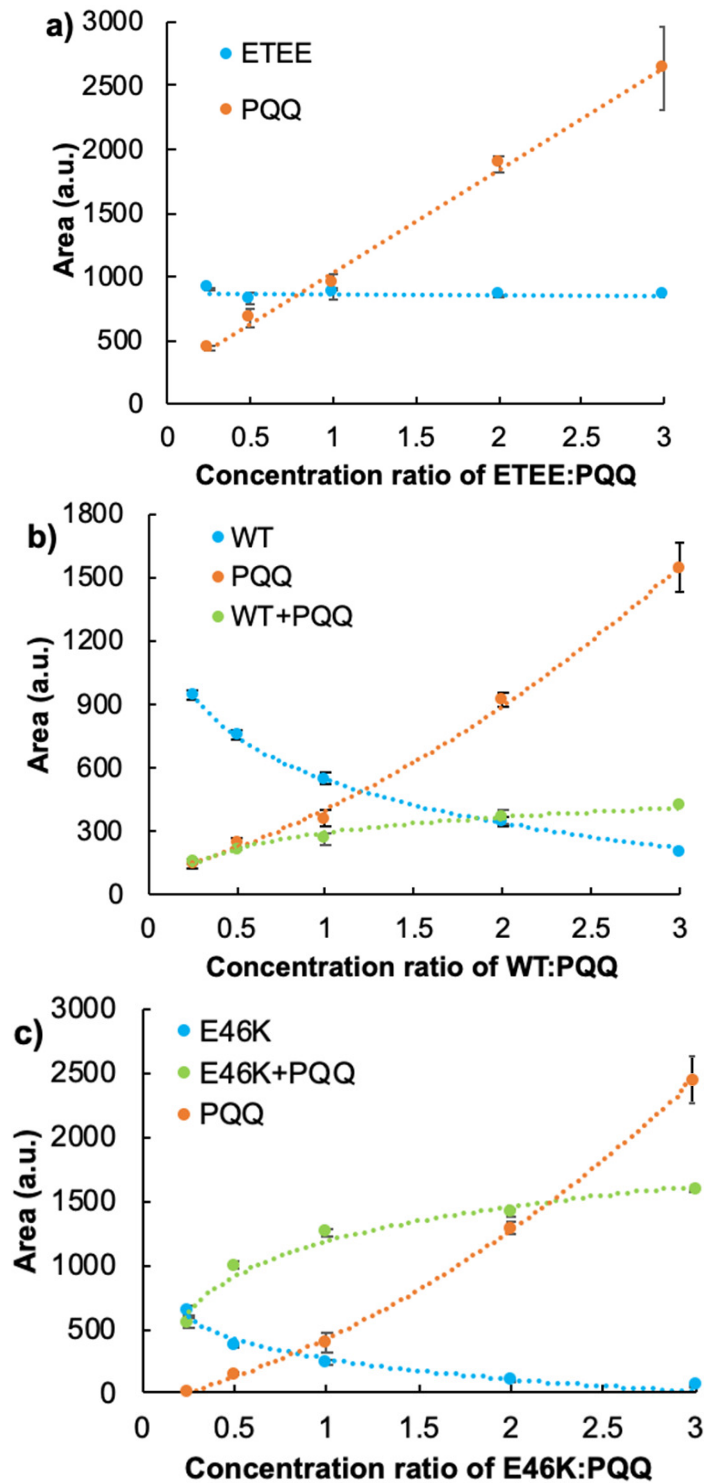

**Fig. S3** Plots for the HPLC signals (area under the curve) analyzing the different peptide and PQQ ratios; with peptides alone in blue, peptides and PQQ in green, and PQQ alone in orange for different species of  $\alpha$ -syn peptides a) ETEE, b) WT, and c) E46K. Error bars represent the standard deviation of triplicate measurements ( $n=3$ ).

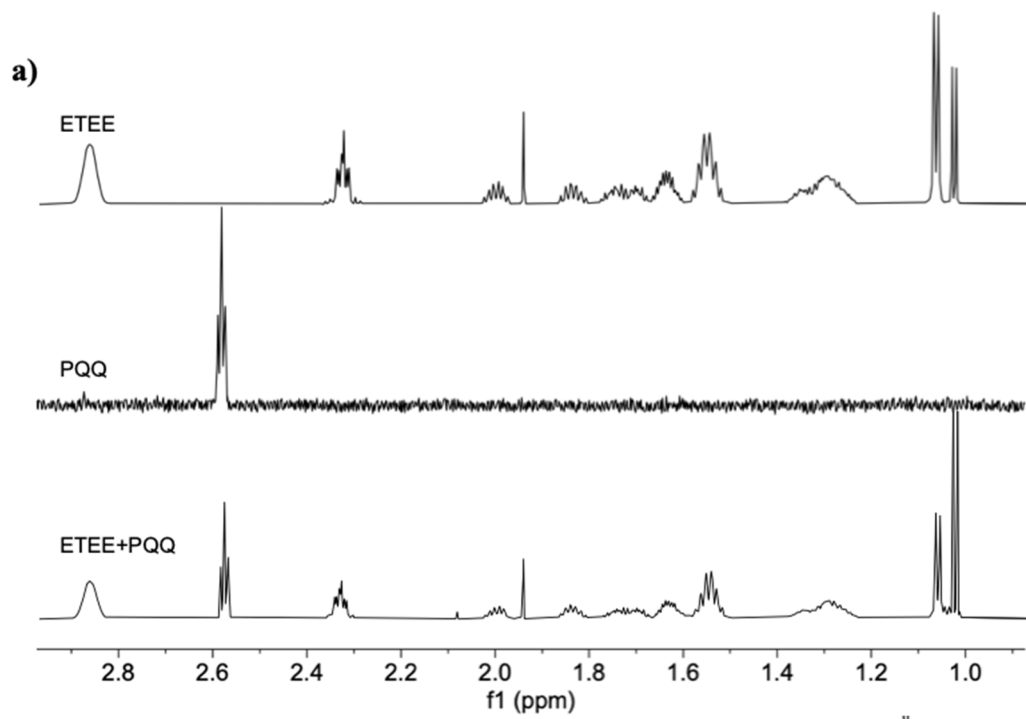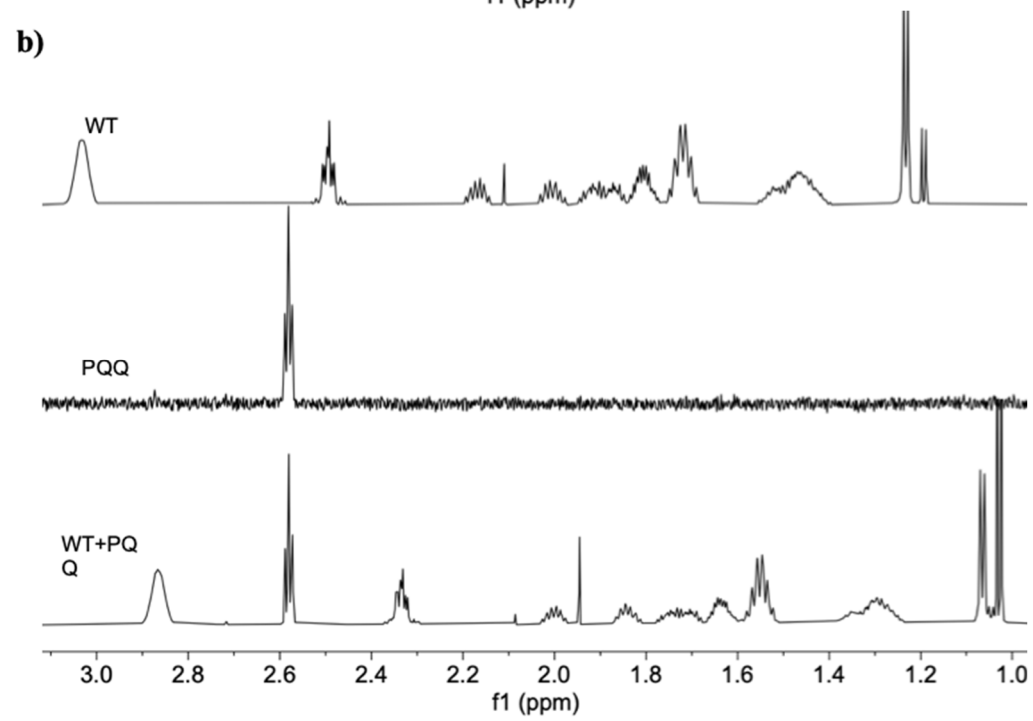

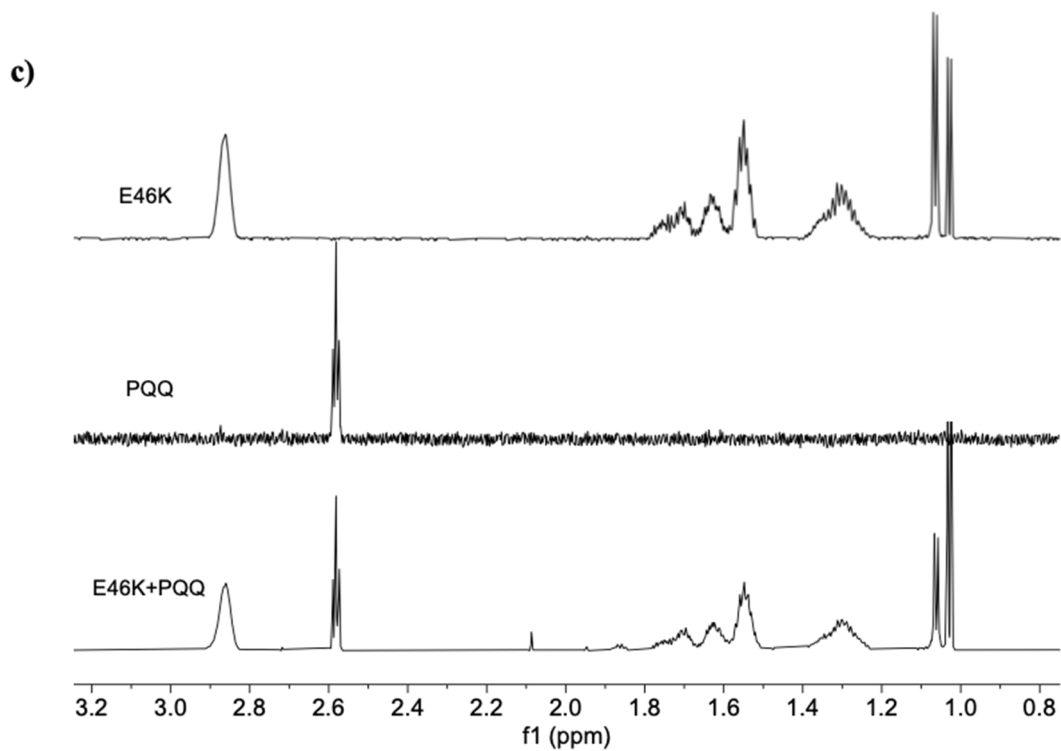

**Fig. S4** Up-field region  $H^1$ -NMR of peptides alone, PQQ alone, and peptide-PQQ complexes for a) ETEE, b) WT, and c) E46K.

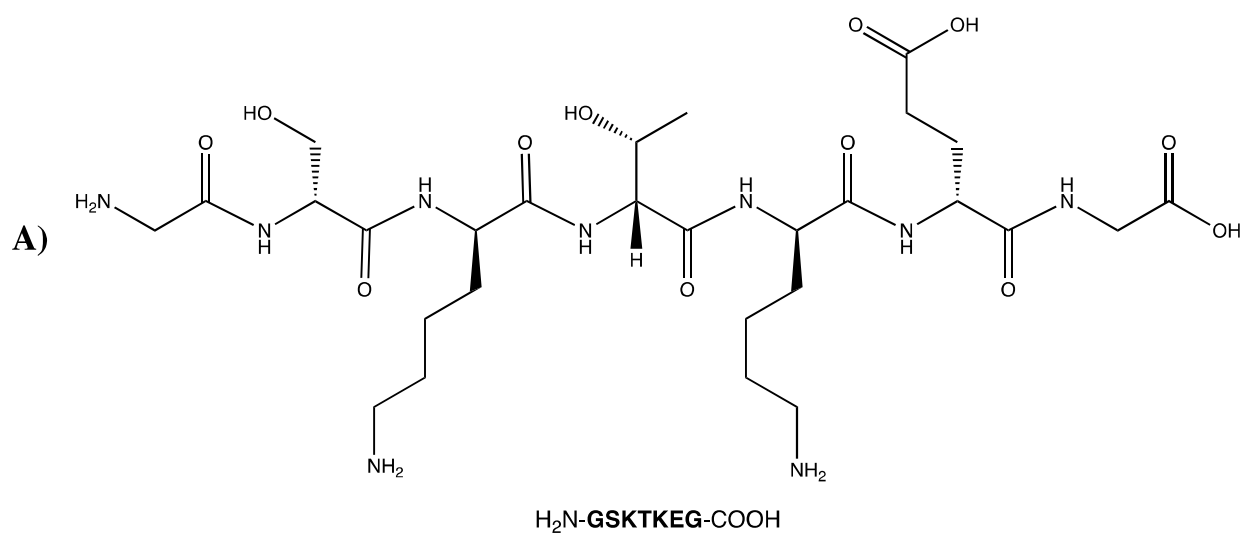

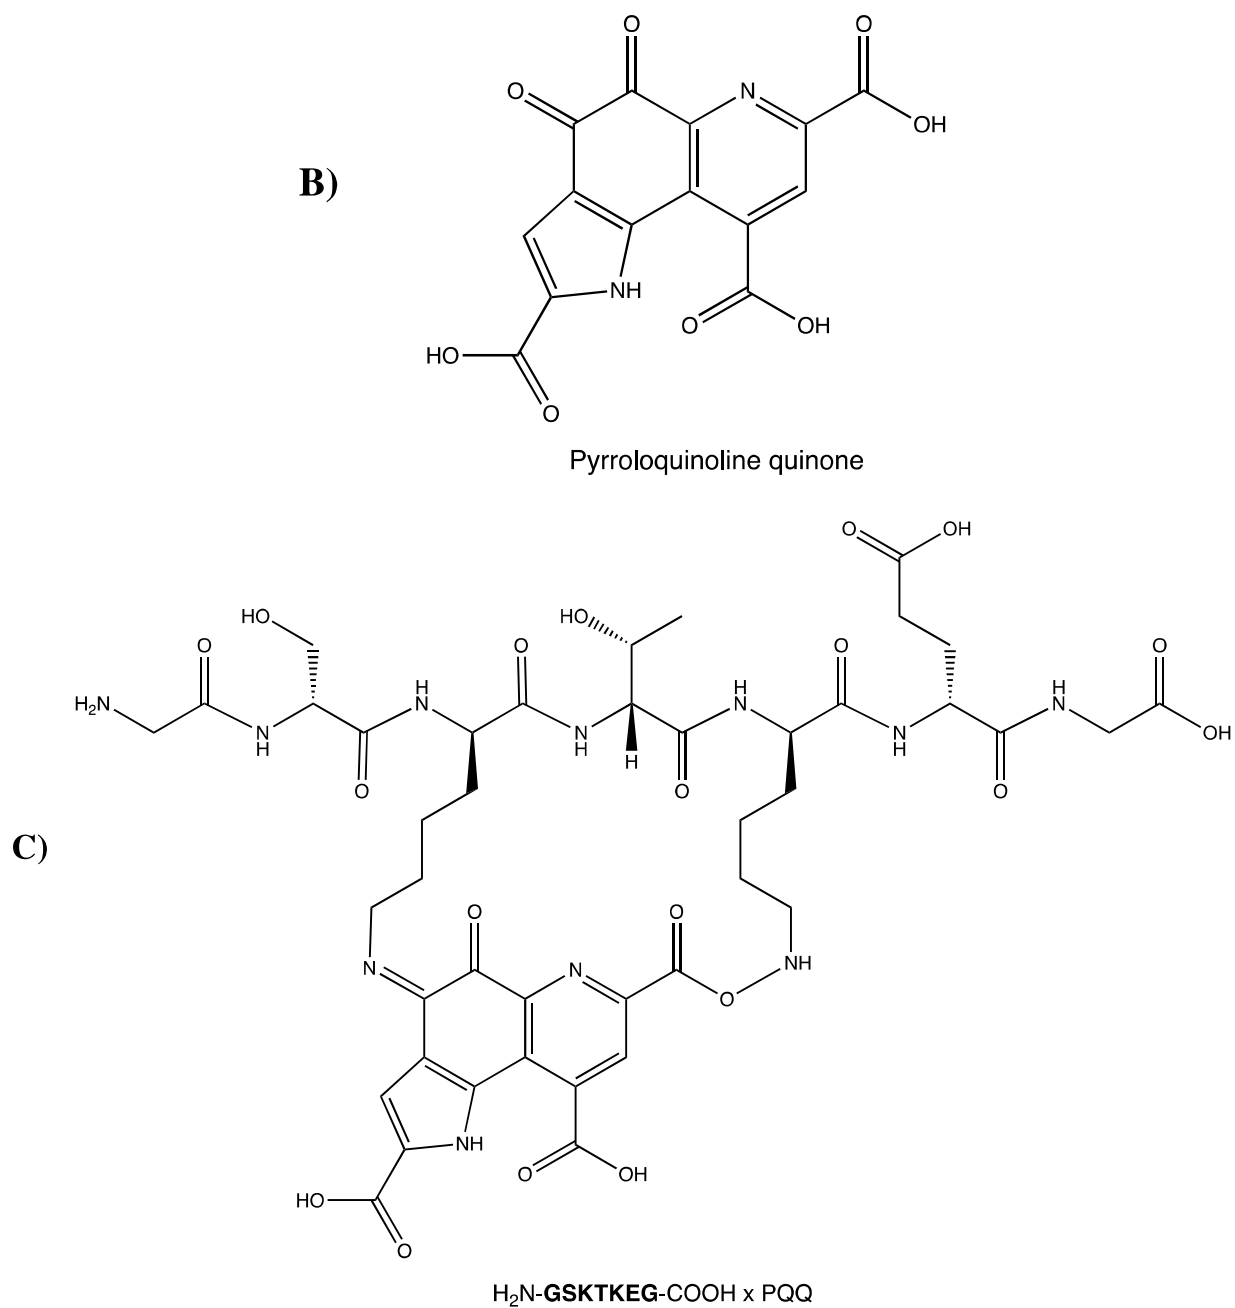

**Fig. S5** Schematic illustration of A) WT peptide (GSKTKEG), B) Pyrroloquinoline quinone (PQQ) and C) the proposed structure of PQQ conjugated with WT peptide.

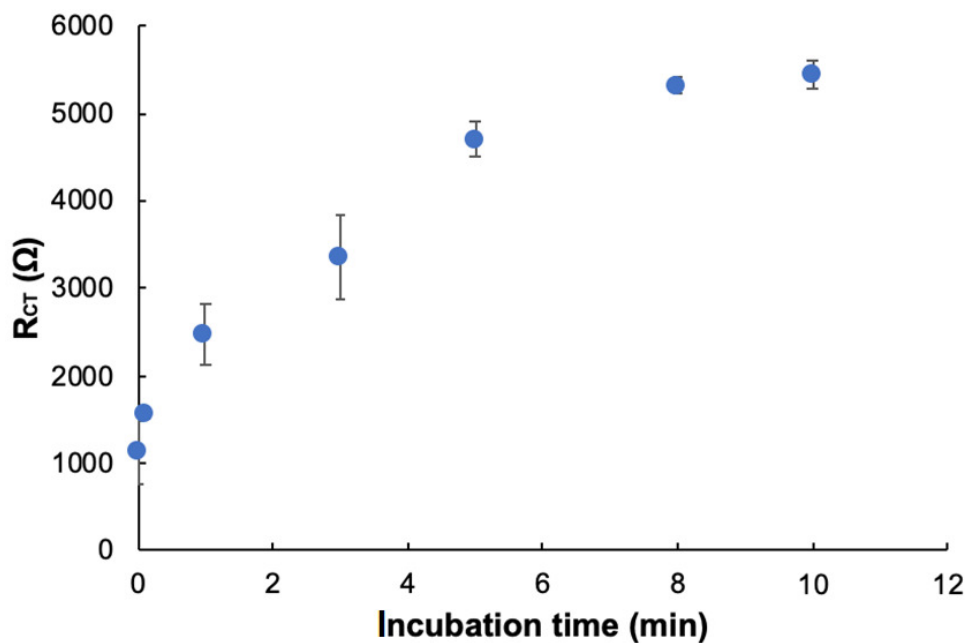

**Fig. S6** Plot for the dependence of  $R_{CT}$  on WT peptide-modified SPEs incubated with  $0.01 \mu\text{M}$  PQQ for different durations of incubation. Error bars represent the standard deviation of triplicate measurements ( $n=3$ ).

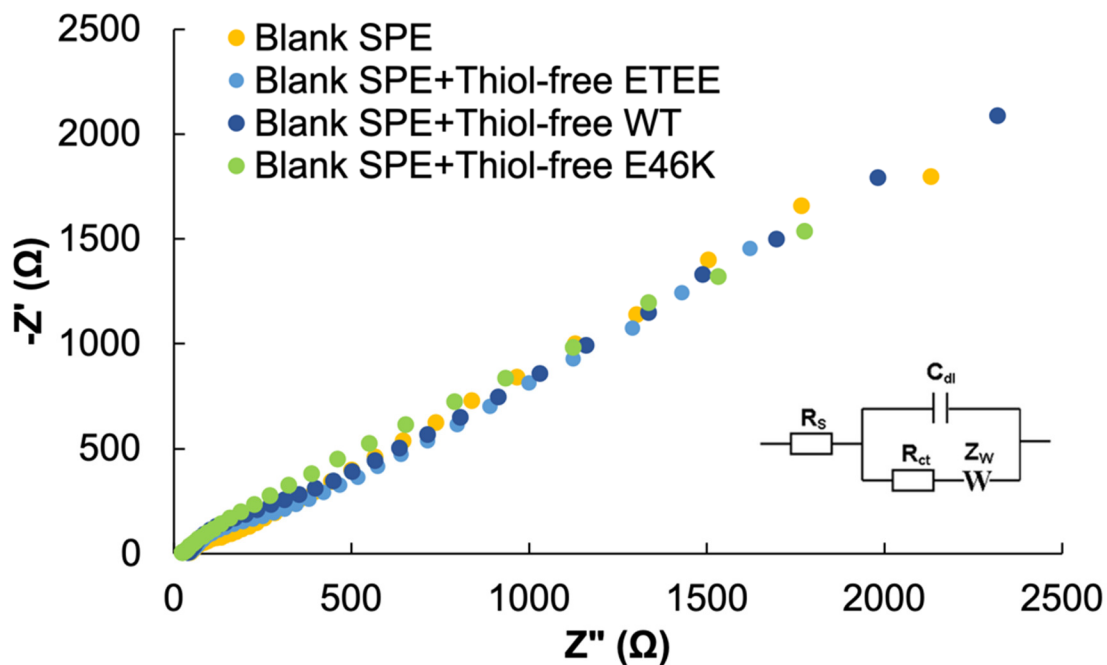

**Fig. S7** Nyquist plot of (yellow) blank gold screen-printed electrodes (SPEs) incubated with thiol-free (light blue) ETEE, (dark blue) WT and (green) E46K peptides. The redox probe was  $10 \text{ mM}$   $[\text{Fe}(\text{CN})_6]^{3-/4-}$  in  $0.1 \text{ M}$   $\text{NaClO}_4$  (pH 7.0).



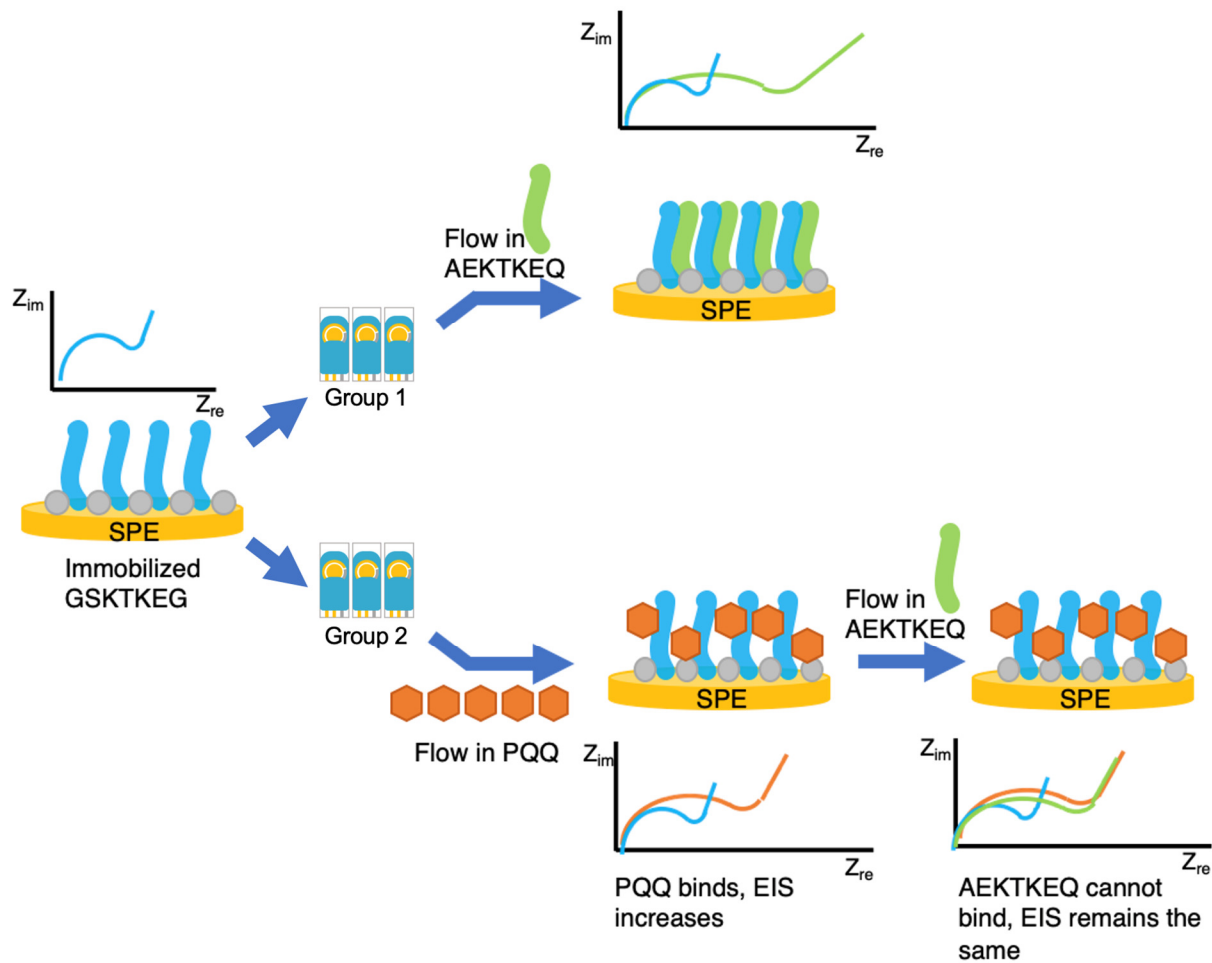

**Fig. S8** Schematic illustration of the experimental design for studying the effects of PQQ on the intramolecular interactions of  $\alpha$ -syn misfolding as described in the results shown in Figure 8.
